# Supplementary material
Source: Springer Nature journal article supplement (https://www.springermedizin.de/resource/supplementary/12990_2010_327_MOESM1_ESM.pdf/9613040)
Supplement: MOESM1 [file 9613040]

# Aura of Migraine

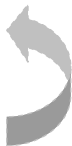

**Cortical Spreading Depression  
(CSD)**

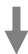

**TGVS**

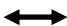

**Inflammation**

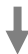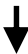

**TNC**

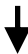

**Central  
Sensitization**

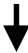

**Thalamus etc. pain centers**

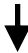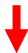

**PAIN**
